# Supplementary material for: Dislocation-driven growth of WS2/WSe2 quantum well superlattices
Source: Frontiers journal article supplement (doi:10.3389/fmats.2023.1108077), 2023-03-02
Supplement: Data_Sheet_1.docx [file Data_Sheet_1.docx]

Dislocation-driven growth of WS2/ WSe2 quantum well superlattices


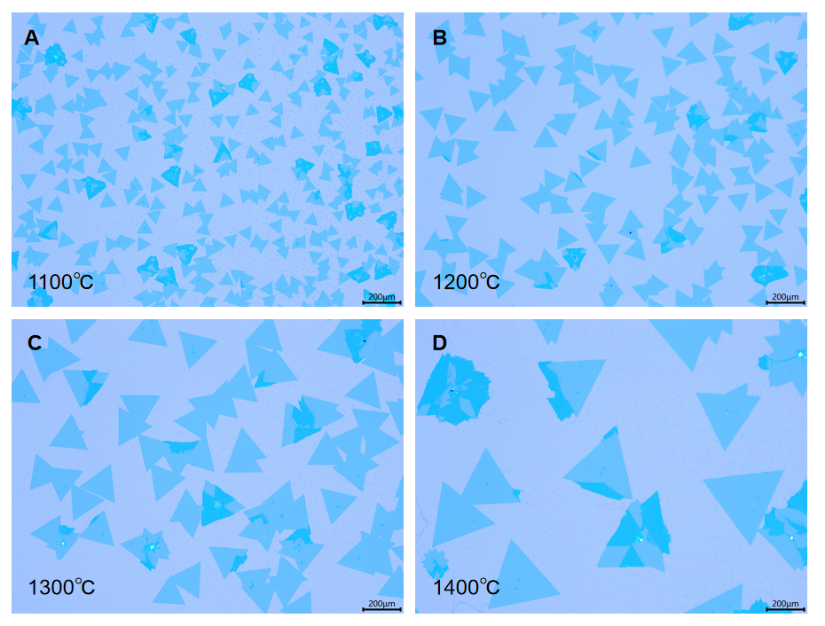


**Supplementary Figure 1.** Optical images of the synthesized monolayer WSe2 using the reverse airflow method at different growth temperature.


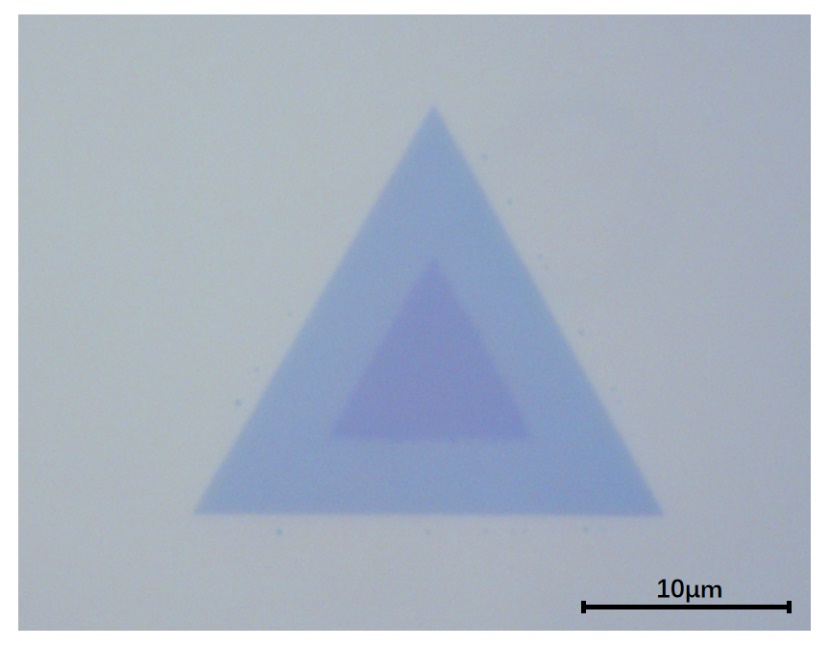


**Supplementary Figure 2.** Optical image of the WSe2/WS2 lateral heterojunction using the reverse airflow method.


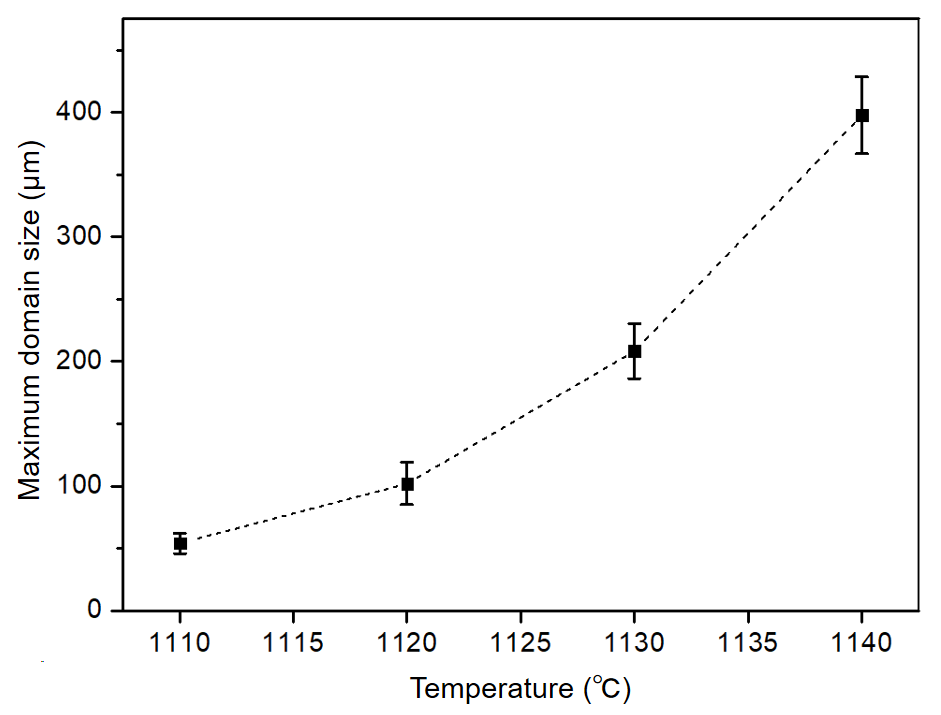


**Supplementary Figure 2.** Relationship between maximum crystal domain size of monolayer WSe2 and growth temperature.
